# Supplementary material
Source: publisher site journal article supplement (https://www.dovepress.com/get_supplementary_file.php?f=498950.docx)
Supplement: Supplementary file 1 [file get_supplementary_file.php]

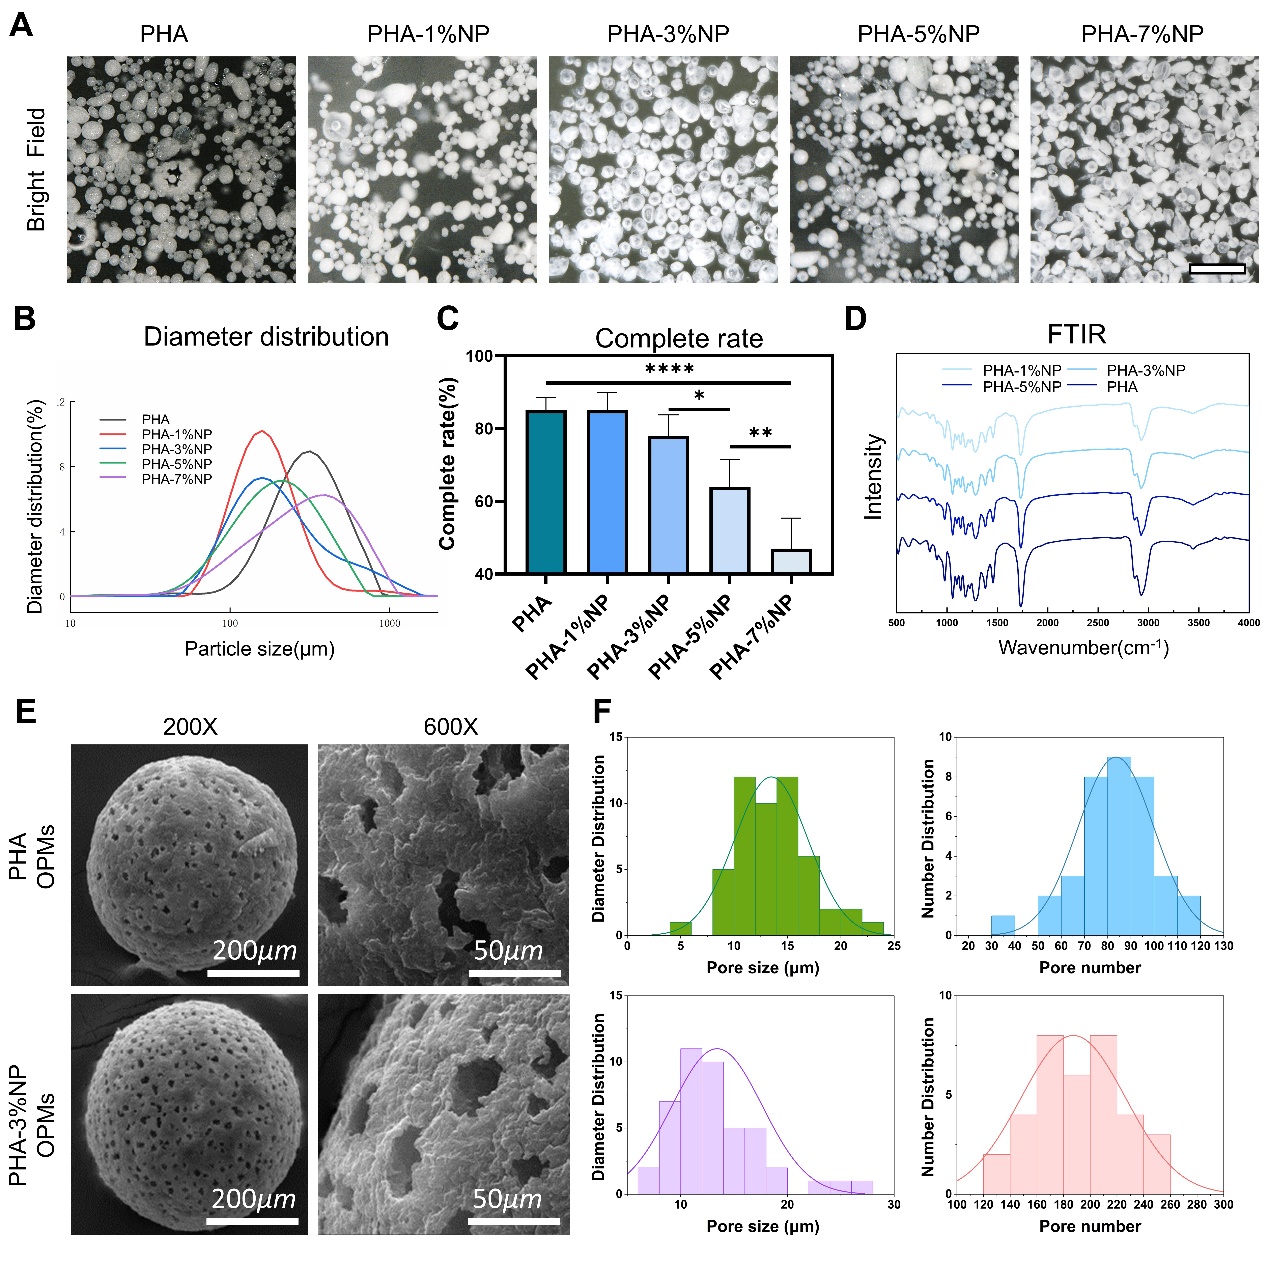


**Figure S1** (A) SEM image of nano-clay powder. (B) Morphology and Nile red staining of PHA-5%NP microspheres with different homogenizer speeds during secondary emulsion. The bars are 1 mm. (C) Size distribution of PHA-5%NP microspheres with different homogenizer speeds during secondary emulsion. (D) Porosity rates of PHA- OPMs and PHA-3%NP OPMs of 100, 200, and 300 μm. (E)SEM images of surface morphology of PHA OPMs and PHA-3%NP OPMs. (F)Quantitative analysis of diameter and pore number of PHA OPMs and PHA-3%NP OPMs. (*p < 0.05; **p < 0.01; ****p < 0.0001).


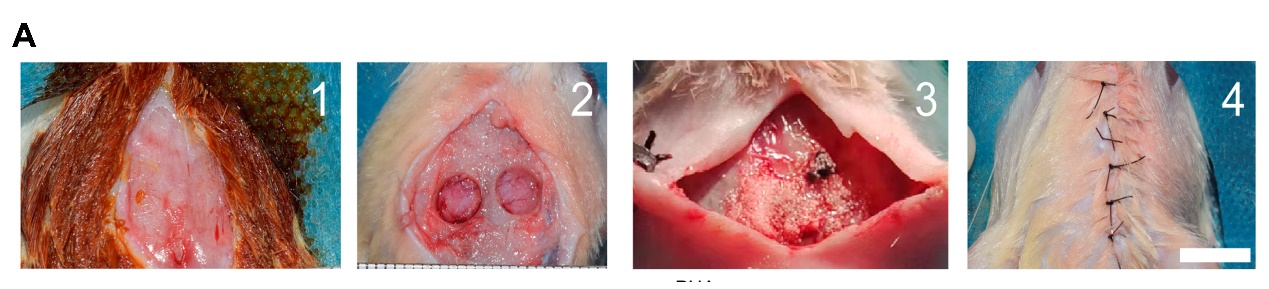


**Figure S2** (A): Illustration of the Rat Cranial Defects Model and In Vivo Microcarrier Implantation.1. Iodine disinfection, followed by skin incision. 2. Drilling two parallel cranial defects in each rat. 3. Filling the defects with microspheres. 4. Performing layered stitching. The bars are 1 cm.
